# Supplementary material for: Controlling pore size and pore functionality in sp2-conjugated microporous materials by precursor chemistry and salt templating
Source: Royal Society of Chemistry journal article supplement (doi:10.1039/d0ta05856d), 2020-01-01
Supplement: d0ta05856d1.pdf [file d0ta05856d1.pdf]

## ***Supporting Information***

# **Controlling pore size and pore functionality in sp<sup>2</sup>- conjugated microporous materials by precursor chemistry and salt templating**

*Sol Youk<sup>1</sup>, Jan P. Hofmann<sup>2</sup>, Bolortuya Badamdorj<sup>1</sup>, Antje Völkel<sup>1</sup>, Markus Antonietti<sup>1</sup>, Martin  
Oschatz<sup>1,3,\*</sup>*

*<sup>1</sup> Max Planck Institute of Colloids and Interfaces, Colloid Chemistry, Research Campus  
Golm, Am Mühlenberg 1, D-14476 Potsdam, Germany*

*<sup>2</sup> Laboratory for Inorganic Materials and Catalysis, Department of Chemical Engineering and  
Chemistry, Eindhoven University of Technology, P.O. Box 513, 5600 MB, Eindhoven, The  
Netherlands*

*<sup>3</sup> Institute of Chemistry, University of Potsdam, Karl-Liebknecht-Str. 24-25, D-14476  
Potsdam, Germany*

\*Corresponding author. Email: martin.oschatz@mpikg.mpg.de

## *Supplementary Tables*

**Table S1.** EA summary of samples with and without pre-condensation.

|                                                     | N-content<br>(wt.%) | C-content<br>(wt.%) | H-content<br>(wt.%) | C/N | SSA <sub>BET</sub><br>[m <sup>2</sup> g <sup>-1</sup> ] |
|-----------------------------------------------------|---------------------|---------------------|---------------------|-----|---------------------------------------------------------|
| NOC-550                                             | 18.0                | 54.6                | 3.1                 | 3.5 | 532                                                     |
| NOC-550<br>without pre-condensation                 | 11.3                | 57.0                | 3.5                 | 5.1 | 457                                                     |
| NOC-550<br>Without pre-condensation<br>and melamine | 9.3                 | 57.8                | 3.0                 | 6.2 | 290                                                     |

**Table S2.** XPS data summary for atomic and weight percentage (rounded to two significant digits) of elements in the samples.

|             | C-content<br>(at.%)<br>(wt.%) | N-content<br>(at.%)<br>(wt.%) | O-content<br>(at.%)<br>(wt.%) | Zn-content<br>(at.%)<br>(wt.%) | Cl-content<br>(at.%)<br>(wt.%) | Others<br>(at.%) | C/N<br>(at. ratio) |
|-------------|-------------------------------|-------------------------------|-------------------------------|--------------------------------|--------------------------------|------------------|--------------------|
| NOC-350     | 58<br>(53)                    | 29<br>(31)                    | 11<br>(14)                    | 0.1<br>(0.4)                   | 0.9<br>(2.3)                   | -                | 2.0                |
| NOC-550     | 74<br>(69)                    | 20<br>(21)                    | 6.0<br>(7.5)                  | -                              | 0.6<br>(1.8)                   | 0.1              | 3.8                |
| NOC-750     | 78<br>(73)                    | 15<br>(17)                    | 5.0<br>(6.2)                  | 0.2<br>(1.1)                   | 0.9<br>(2.6)                   | -                | 5.1                |
| NOC-950     | 87<br>(83)                    | 5.1<br>(5.6)                  | 6.3<br>(8.0)                  | 0.1<br>(0.3)                   | 0.7<br>(1.9)                   | 0.5              | 17.1               |
| NOC-350-550 | 74<br>(69)                    | 20<br>(22)                    | 6.4<br>(8.0)                  | 0.2<br>(1.0)                   | 0.1<br>(0.3)                   | -                | 3.7                |
| NOC-550-750 | 82<br>(76)                    | 13<br>(14)                    | 3.7<br>(4.6)                  | 0.8<br>(4.0)                   | 0.5<br>(1.5)                   | -                | 6.2                |
| NOC-550-950 | 93<br>(91)                    | 4.6<br>(5.3)                  | 2.8<br>(3.7)                  | 0.1<br>(0.3)                   | -                              | -                | 20.1               |

## Supplementary Figures

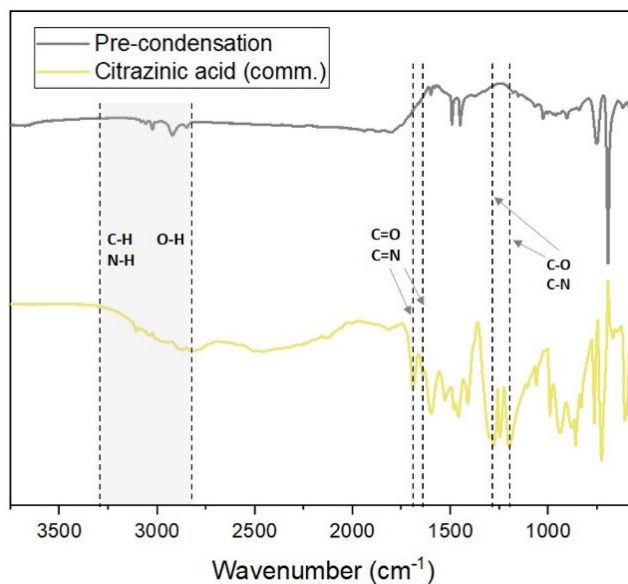

**Figure S1.** FT-IR spectra of commercial citrazinic acid and the product after pre-condensation.

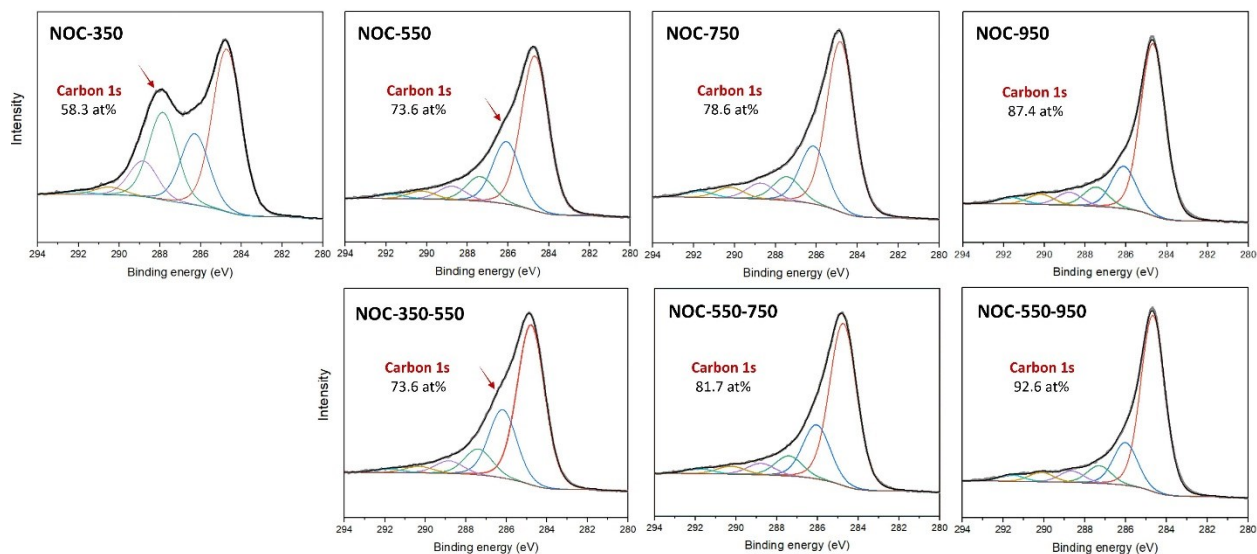

**Figure S2.** High-resolution  $\text{C}1\text{s}$  XPS spectra and corresponding fitting curves of NOC-Xs and NOC-X-Ys.

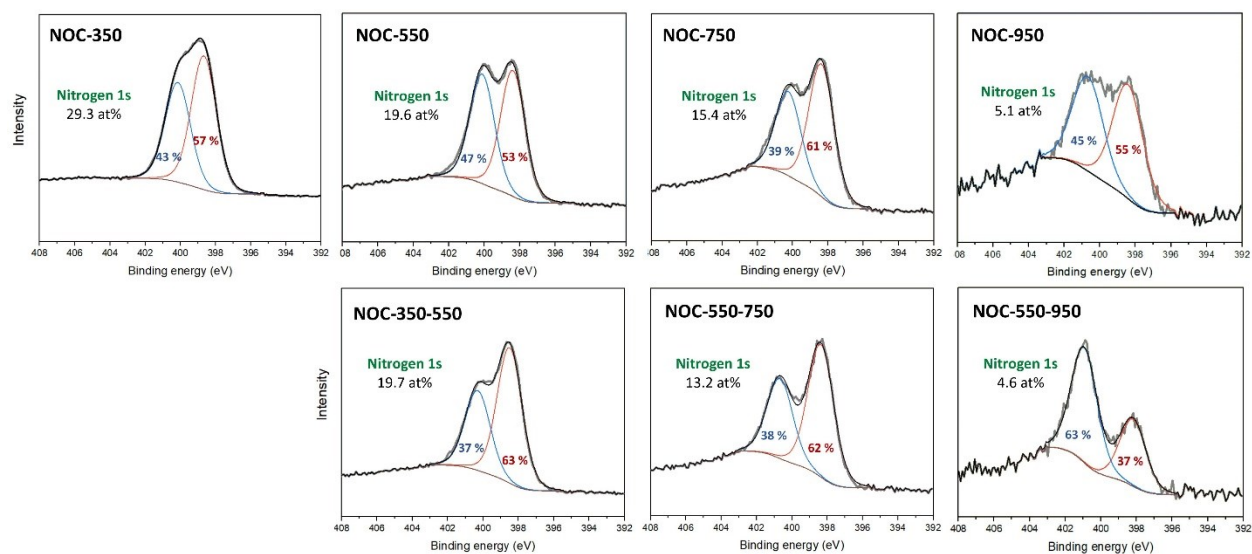

**Figure S3.** High-resolution N1s XPS spectra and corresponding fitted curves of NOC-Xs and NOC-X-Ys.

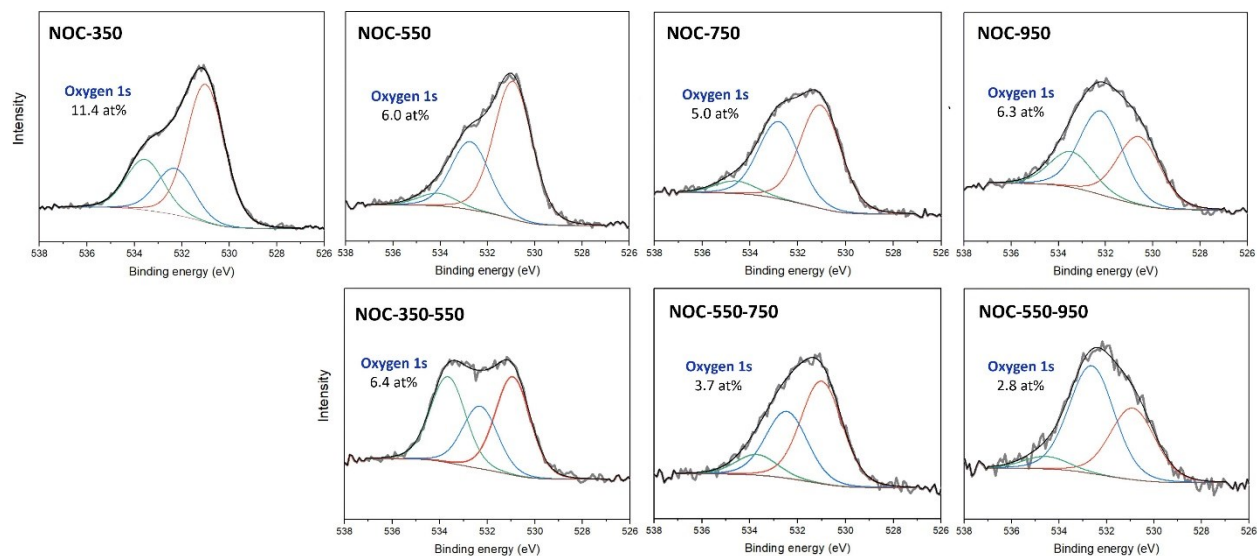

**Figure S4.** High-resolution O1s XPS spectra and corresponding fitted curves of NOC-Xs and NOC-X-Ys.

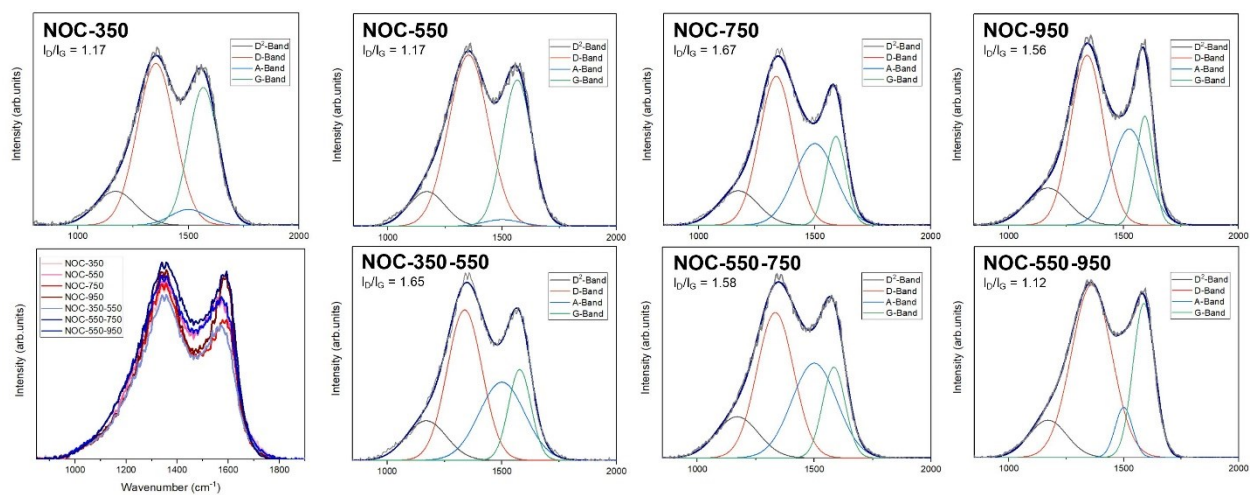

**Figure S5.** Fitted Raman spectra of NOC-Xs and NOC-X-Ys.



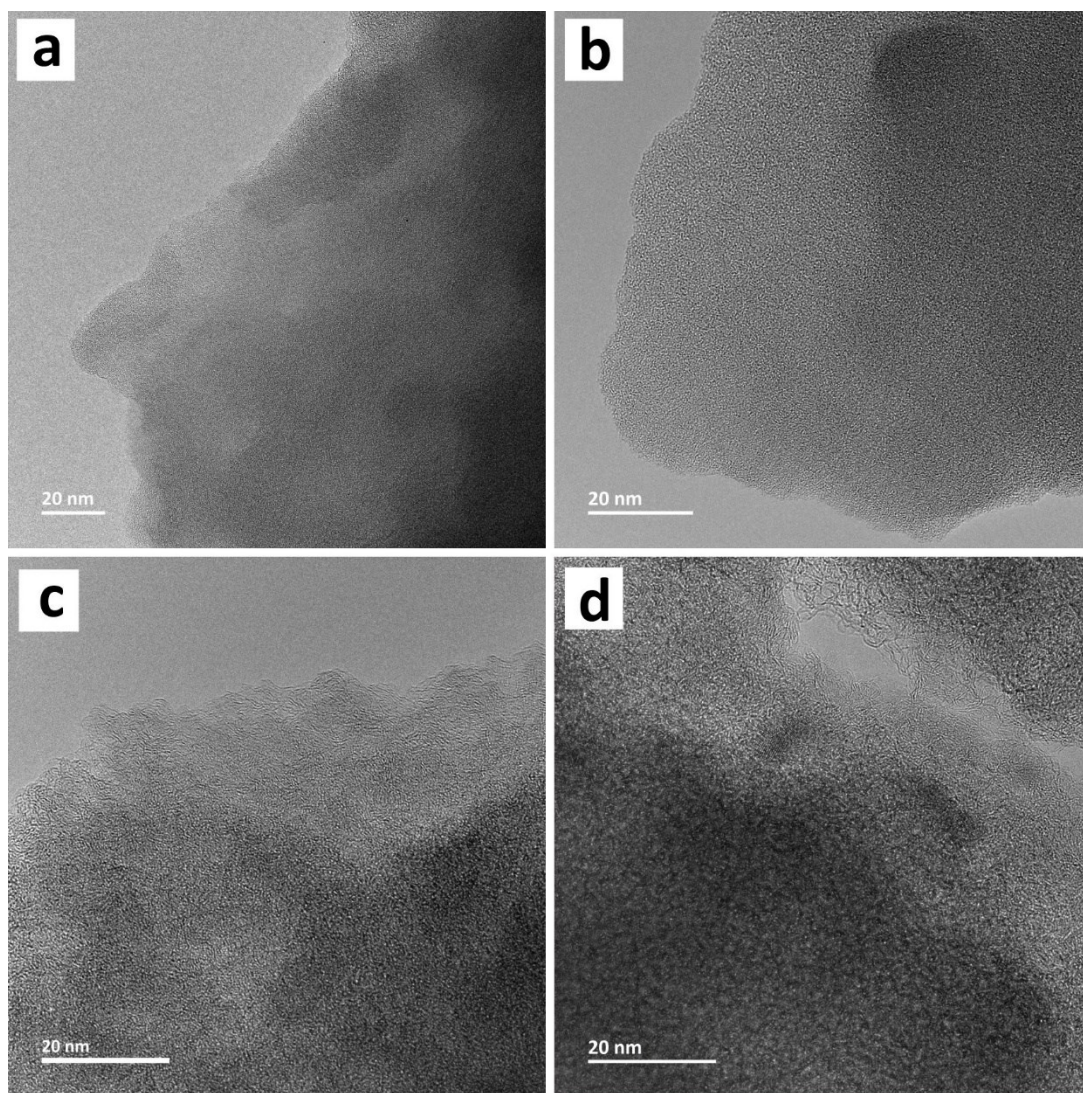

**Figure S6.** High-resolution transmission electron microscopy (HRTEM) images of (a) NOC-350, (b) NOC-550, (c) NOC-750, and (d) NOC-950.

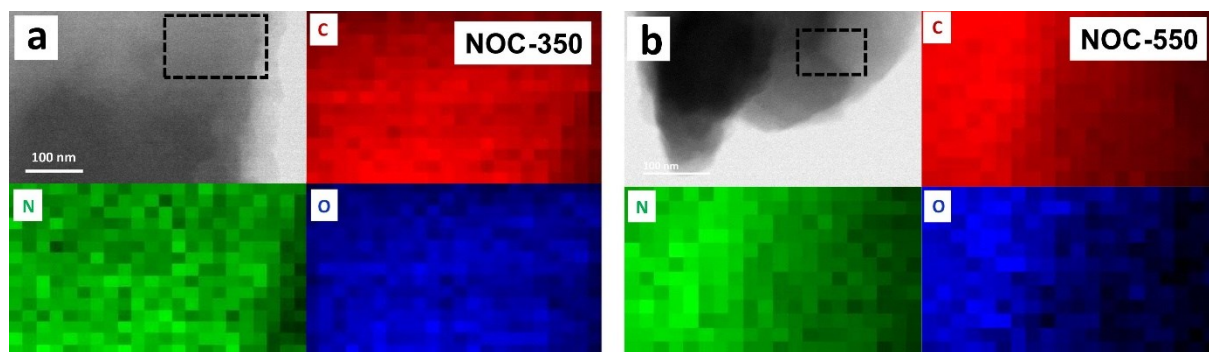

**Figure S7.** EDX elemental mapping of C (red), N (green), and O (blue) of (a) NOC-350 and (b) NOC-550.

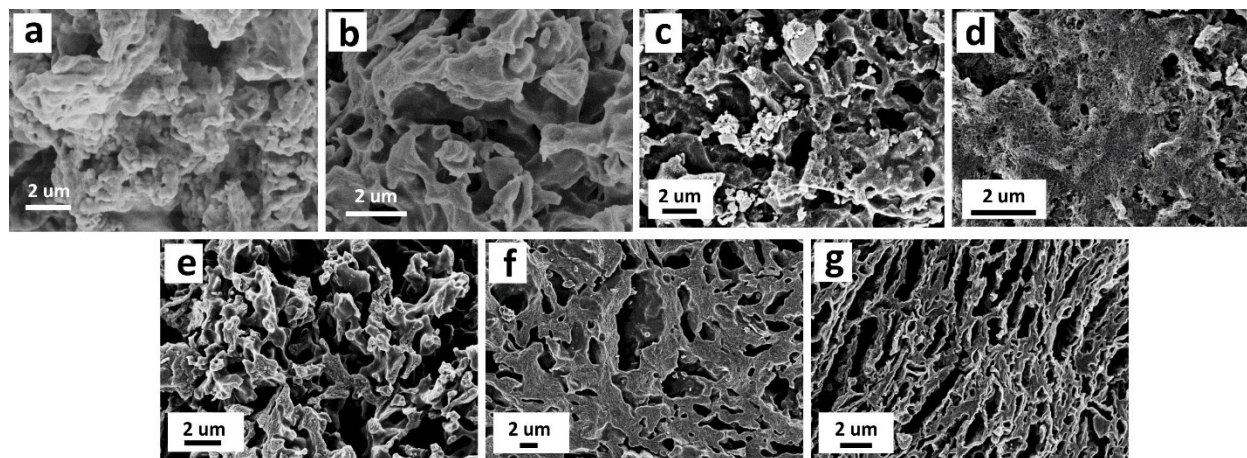

**Figure S8.** Scanning electron microscopy (SEM) images of (a) NOC-350, (b) NOC-550, (c) NOC-750, (d) NOC-950, (e) NOC-350-550, (f) NOC-550-750, and (g) NOC-550-950.



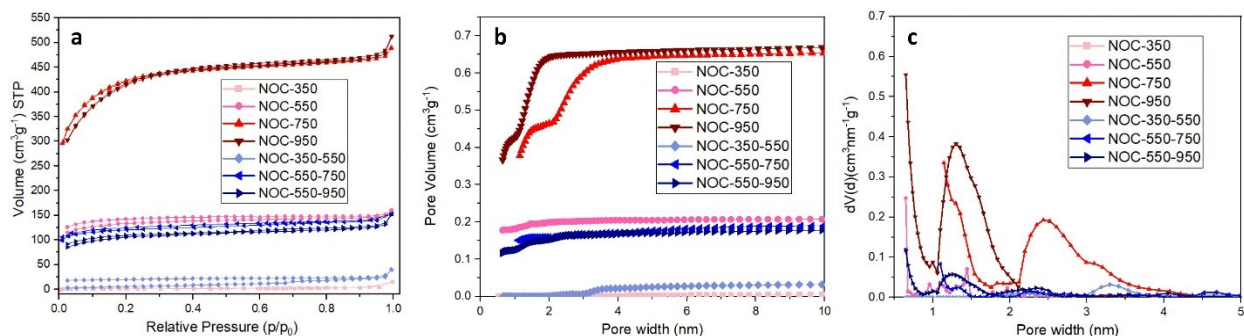

**Figure S9.** (a) N<sub>2</sub> physisorption isotherms (77 K), (b) corresponding cumulative pore volume distribution, and (c) differential pore size distribution calculated with QSDFT (N<sub>2</sub> on carbons with cylindrical/sphere pores at 77 K) of NOC-Xs and NOC-X-Ys.

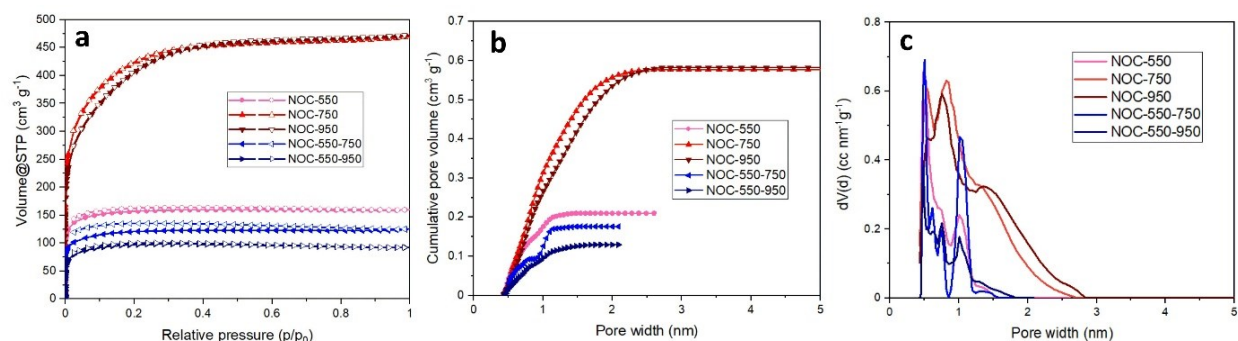

**Figure S10.** (a) Argon physisorption isotherms (87 K, filled and open symbols represent adsorption and desorption branches, respectively), (b) corresponding cumulative pore volume distribution, and (c) differential pore size distribution calculated with QSDFT equilibrium model (argon on carbons with slit pores at 87 K) of NOC-Xs and NOC-X-Ys.



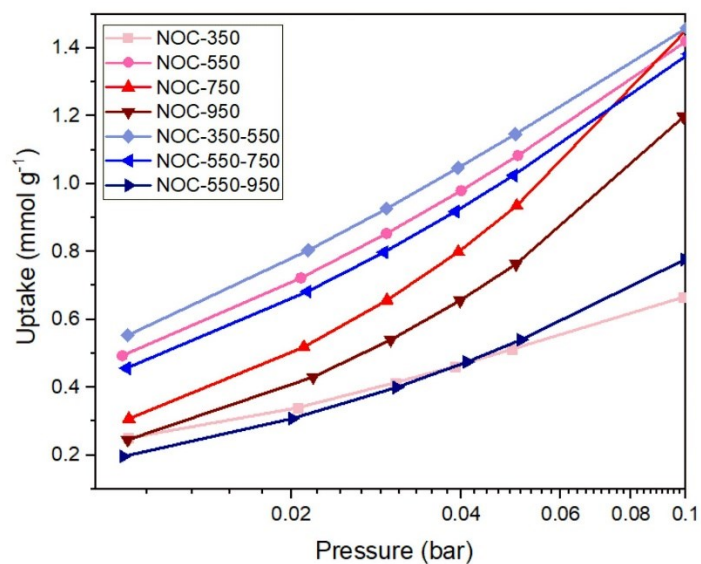

**Figure S11.** Logarithmic plots of CO<sub>2</sub> isotherms (273 K) in the low pressure range.

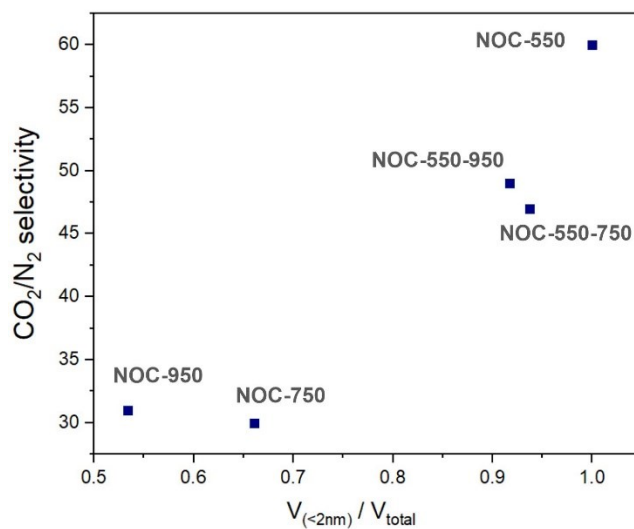

**Figure S12.** Relation between the CO<sub>2</sub>/N<sub>2</sub> selectivity at 273 K and the ratio of micropore volume to total pore volume from Ar physisorption.

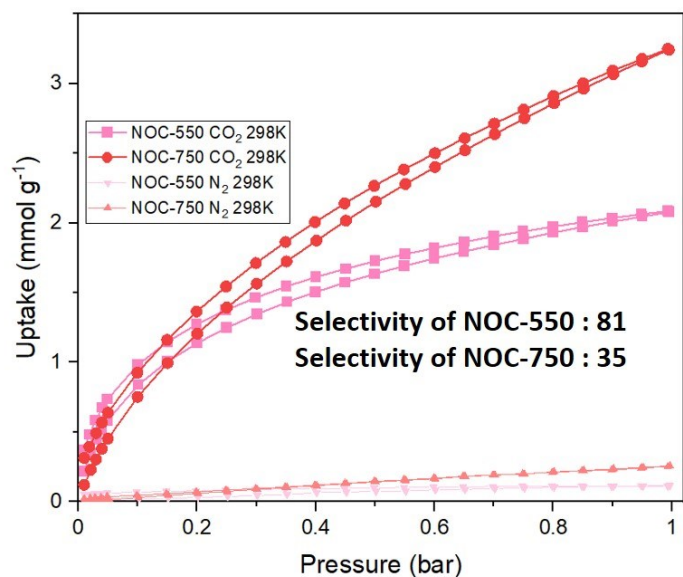

**Figure S13.** (a) CO<sub>2</sub> and N<sub>2</sub> physisorption isotherms of NOC-550 and NOC-750 measured at 298 K.

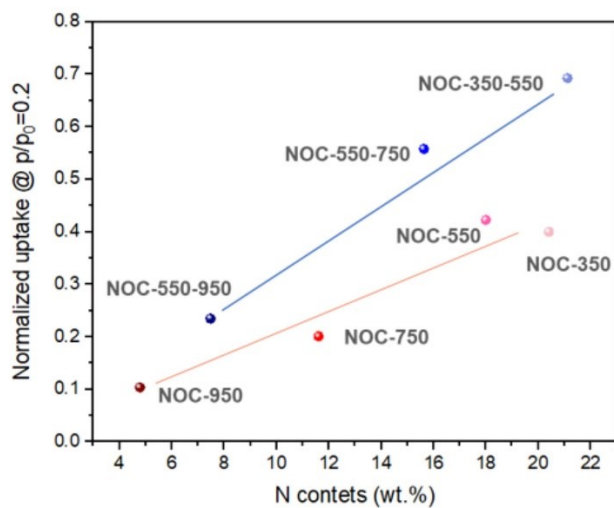

**Figure S14.** The normalized uptake at relative pressure  $p/p_0 = 0.2$  as a function of the N content of NOC-Xs and NOC-X-Ys from EA.
